# Supplementary material
Source: Springer Nature journal article supplement (https://www.springermedizin.de/resource/supplementary/12939_2013_467_MOESM3_ESM.pdf/9551234)

Reason

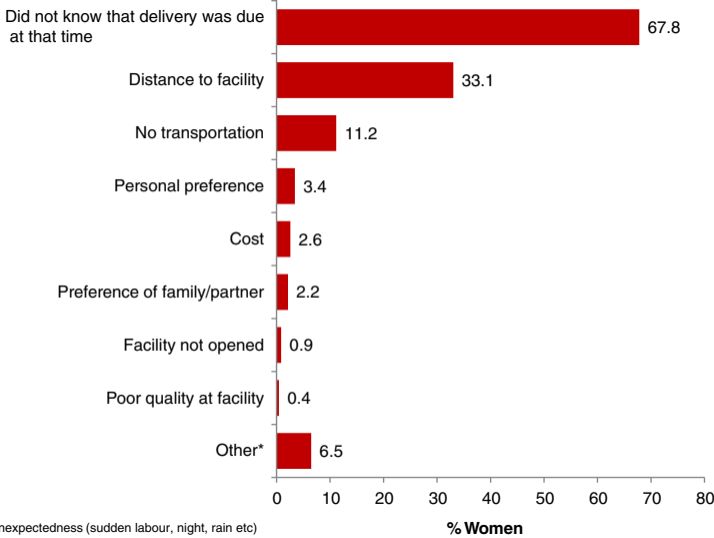

\*Unexpectedness (sudden labour, night, rain etc)

% Women

Supplement: MOESM3 [file 9551234]
